# Supplementary material for: Characterization of a profilin-like protein from Fasciola hepatica
Source: PeerJ journal article supplement (doi:10.7717/peerj.10503), 2020-12-07
Supplement: MSA_suppl_Fig_1.pdf [file MSA_suppl_Fig_1.pdf]

| 1          | 11         | 21         | 31         | 41         | 50 |                                        |
|------------|------------|------------|------------|------------|----|----------------------------------------|
| MS-E-EWCAR | CRS-HVGDYK | SLASLAFTGL | DGNLYGNSDS | TN-----    |    | 39 <i>F. hepatica</i> _D915_008168     |
| MS-D-AWSQQ | CQQ-YLAKYP | ALKCLAITSL | DGTIYGNSDA | TE-----    |    | 39 <i>C. sinensis</i> _GAA56606.1      |
| MS-D-AWTQQ | CQQ-YLTKYP | ALKCLAITSL | DGTIYGNSDA | TE-----    |    | 39 <i>O. viverrini</i> _XP_009173283.1 |
| MSAD-SWDNH | CVT-YVANNK | CLKNLCMTAI | DGSHLGTSNP | D-----     |    | 39 <i>S. japonicum</i> _CAX7805.1      |
| MA---GWNAY | IDN-LMADGT | CQDAIVGYK  | DSPSVWAAVP | GK-----    |    | 38 <i>H. sapiens</i> _P07737           |
| MA---GWNAY | IDN-LMADGT | CQDAIVGYK  | DSPSVWAAVP | GK-----    |    | 38 <i>B. taurus</i> _P02584            |
| M---SWQAY  | TDN-LIGTGK | VDKAVIYSRA | GDAVWATSGG | LS-----    |    | 37 <i>S. cerevisiae</i> _P07274        |
| MAEYESWDSY | LNDRLLATNQ | VSGAGLASEE | DGVVYACVAQ | GEESDPNFDK |    | 50 <i>P. falciparum</i> _P86294        |
| MS---DWDPV | VKEWLVDTRY | CCAGGIANAE | DGVVFAAAAD | DD-----DG  |    | 41 <i>T. gondii</i> _Q58NA1            |
| MS---DWDPV | VKEWLVDTRY | CCAGGIANAE | DGVVFAAAAD | DD-----DG  |    | 41 <i>N. caninum</i> _F0V772           |
| MA---DWPVT | IKQLALADNA | CYCGGIANAE | DGELFSAADI | DH-----DD  |    | 41 <i>B. bovis</i> _Q307P5             |
| #          |            |            | #          |            |    |                                        |

|            |            |                |            |            |  |                                        |
|------------|------------|----------------|------------|------------|--|----------------------------------------|
| -----      | -----      | -----FPVT      | VEFAKSAIAA | FSGASPSSLT |  | 63 <i>F. hepatica</i> _D915_008168     |
| -----      | -----      | -----FPLD      | QAFMKQVFAS | MKGDPASSIP |  | 63 <i>C. sinensis</i> _GAA56606.1      |
| -----      | -----      | -----FPLD      | QAFMKQVFAS | MKGDPASSIP |  | 63 <i>O. viverrini</i> _XP_009173283.1 |
| -----      | -----      | -----FRIP      | PELILQLKSI | LDGGLDTSIF |  | 63 <i>S. japonicum</i> _CAX7805.1      |
| -----      | -----      | -----TFVNITPAE | VGVLVGKDR- | -SSFYVNGLT |  | 65 <i>H. sapiens</i> _P07737           |
| -----      | -----      | -----TFVNITPAE | VGILVGKDR- | -SSFYVNGLT |  | 65 <i>B. taurus</i> _P02584            |
| -----      | -----      | -----LQPNE     | IGEIVQGFND | PAGLQSNGLH |  | 62 <i>S. cerevisiae</i> _P07274        |
| --WSLFYKED | YDIEV--EDN | GTKTTKTINE     | GQTILVVFN- | -EGYAPDGWV |  | 94 <i>P. falciparum</i> _P86294        |
| --WSKLYKDD | HEEDTIGEDG | NACGKVSINE     | ASTIKAAVD- | -DGSAPNGWV |  | 87 <i>T. gondii</i> _Q58NA1            |
| --WSKLYKED | HEEDTIGEDG | NVNGKVTVNE     | ASTIKAAVD- | -DGSAPNGWV |  | 87 <i>N. caninum</i> _F0V772           |
| LCWDSVYRDP | YEFEAT-DEN | GQPIKHQITE     | KATIMEVFE- | -KRRSSIGIF |  | 88 <i>B. bovis</i> _Q307P5             |

|            |            |            |            |            |  |                                        |
|------------|------------|------------|------------|------------|--|----------------------------------------|
| LNGEKFIVLQ | KNDECLIGKC | GRKT-----  | -----LF    | VYPCKSSCIF |  | 99 <i>F. hepatica</i> _D915_008168     |
| LAGEKYMCLR | SSPECWLGRK | EKKA-----  | -----IF    | VYPCKTIAVV |  | 99 <i>C. sinensis</i> _GAA56606.1      |
| LAGEKYMCLR | SSPDCWLGRK | EKKA-----  | -----IF    | VYPCRTIAVV |  | 99 <i>O. viverrini</i> _XP_009173283.1 |
| FMGEKYIVLQ | HDSSCLVSRK | GKKS-----  | -----LI    | FYATRKCILV |  | 99 <i>S. japonicum</i> _CAX7805.1      |
| LGGQKCSVIR | DSL---LQDG | EFSMDLRTKS | TGGAPTFNVT | VTKTDKTLVL |  | 112 <i>H. sapiens</i> _P07737          |
| LGGQKCSVIR | DSL---LQDG | EFTMDLRTKS | TGGAPTFNIT | VTMTAKTLVL |  | 112 <i>B. taurus</i> _P02584           |
| IQQQKFMLLR | ADDRSIYGRH | DAEG-----  | -----VV    | CVRTKQTVII |  | 98 <i>S. cerevisiae</i> _P07274        |
| LGGTKYQFIN | IERDLEFEGY | NFDVATCAKL | KGGLH---LV | KVPGGNILVV |  | 141 <i>P. falciparum</i> _P86294       |
| IGGQKYKVVR | PEKGFYNDK  | TFDITMCARS | KGGAH---LI | KTPNGSIVIA |  | 134 <i>T. gondii</i> _Q58NA1           |
| IGGQKYKVVR | PEKGFYNDK  | TFDITMCARS | KGGAH---LI | KTPNGSIVIA |  | 134 <i>N. caninum</i> _F0V772          |
| IGGNKYTFAN | YDDDCPVGDY | TFKCVSAAKN | KGGAH---LV | KTPGGYIVIC |  | 135 <i>B. bovis</i> _Q307P5            |
| Δ          |            | Δ Δ        |            |            |  |                                        |

|             |            |             |   |  |  |                                         |
|-------------|------------|-------------|---|--|--|-----------------------------------------|
| GLSVDTDESM  | NATNGNAACA | MLSEEYKKLK  | Y |  |  | 130 <i>F. hepatica</i> _D915_008168     |
| GMSQDTE SAN | NTSNGSDSVA | RLAELYMKS N | Y |  |  | 130 <i>C. sinensis</i> _GAA56606.1      |
| GLSQDTE SAN | NTSNGSDSVA | RLAELYMKS N | Y |  |  | 130 <i>O. viverrini</i> _XP_009173283.1 |
| GQTVDDDQ-N  | NCTQGNFAIS | RMRDHYERM G | Y |  |  | 129 <i>S. japonicum</i> _CAX7805.1      |
| LMGKEGVH--  | -GGLINKKCY | EMASHLRRSQ  | Y |  |  | 140 <i>H. sapiens</i> _P07737           |
| LMGKEGVH--  | -GGMINKKCY | EMASHLRRSQ  | Y |  |  | 140 <i>B. taurus</i> _P02584            |
| AHYPTVQ--   | -AGEATKIVE | QLADYLIGVQ  | Y |  |  | 126 <i>S. cerevisiae</i> _P07274        |
| LYDEEKEQ--  | DRGNSKIAAL | TFAKELAESS  | Q |  |  | 170 <i>P. falciparum</i> _P86294        |
| LYDEEKEQ--  | DKGNSRTSAL | AFAEYLHQSG  | Y |  |  | 163 <i>T. gondii</i> _Q58NA1            |
| LYDEEKEQ--  | DKGNSRTSAL | AFAEYLHQSG  | Y |  |  | 163 <i>N. caninum</i> _F0V772           |
| VFDENRGQ--  | NKTASRMAAF | ALAEYMAANG  | Y |  |  | 164 <i>B. bovis</i> _Q307P5             |
|             | Δ          | # Δ #       |   |  |  |                                         |
